# Supplementary material
Source: publisher figshare collection journal article supplement (https://frontiersin.figshare.com/ndownloader/files/27974691)
Supplement: Supplementary file 1 [file 27974691]

**Supplementary Material**

**Indirect effects of microplastic-contaminated soils on adjacent soil layers: Vertical changes of soil physical structure and water flow**

Shin Woong Kim*, Yun Liang, Tingting Zhao, Matthias C. Rillig

†Institute of Biology, Freie Universität Berlin, 14195 Berlin, Germany

‡Berlin-Brandenburg Institute of Advanced Biodiversity Research. 14195 Berlin, Germany

* Corresponding author: swkim@zedat.fu-berlin.de

11 pages

7 figures

1 table

**
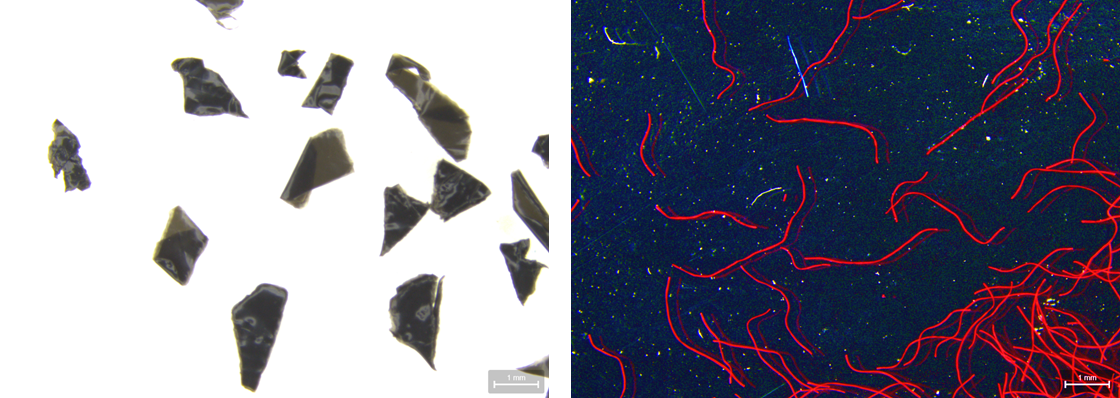
Figure S1**. Target microplastics used in this study: low-density polyethylene (LDPE) films (left) and polyacrylonitrile (PAN) fibers (right).


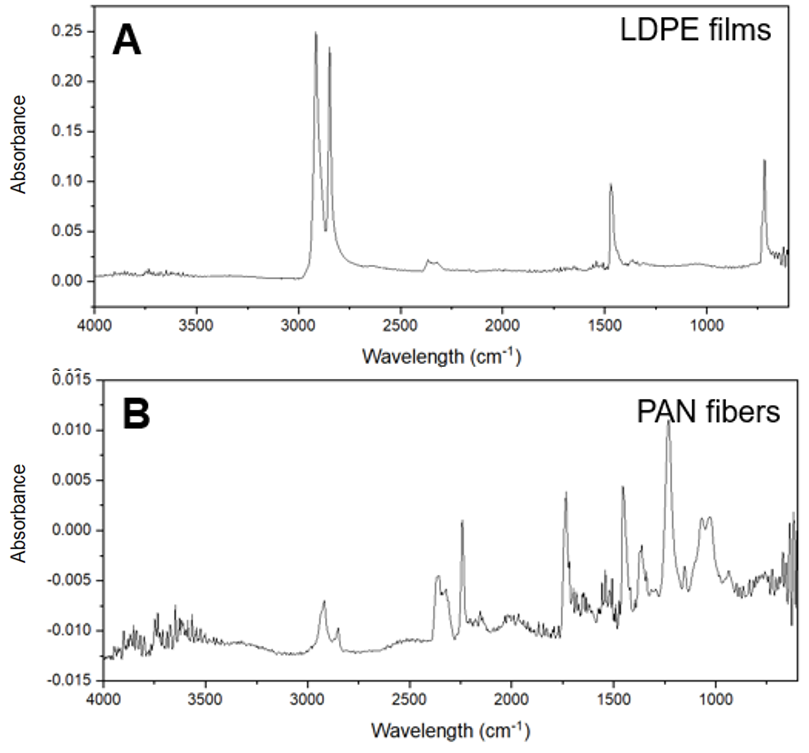


**Figure S2.** FTIR spectra, ATR mode, of all polymers tested in this paper: (A) Low-Density Polyethylene (LDPE) and (B) Polyacrylonitrile (PAN).

**
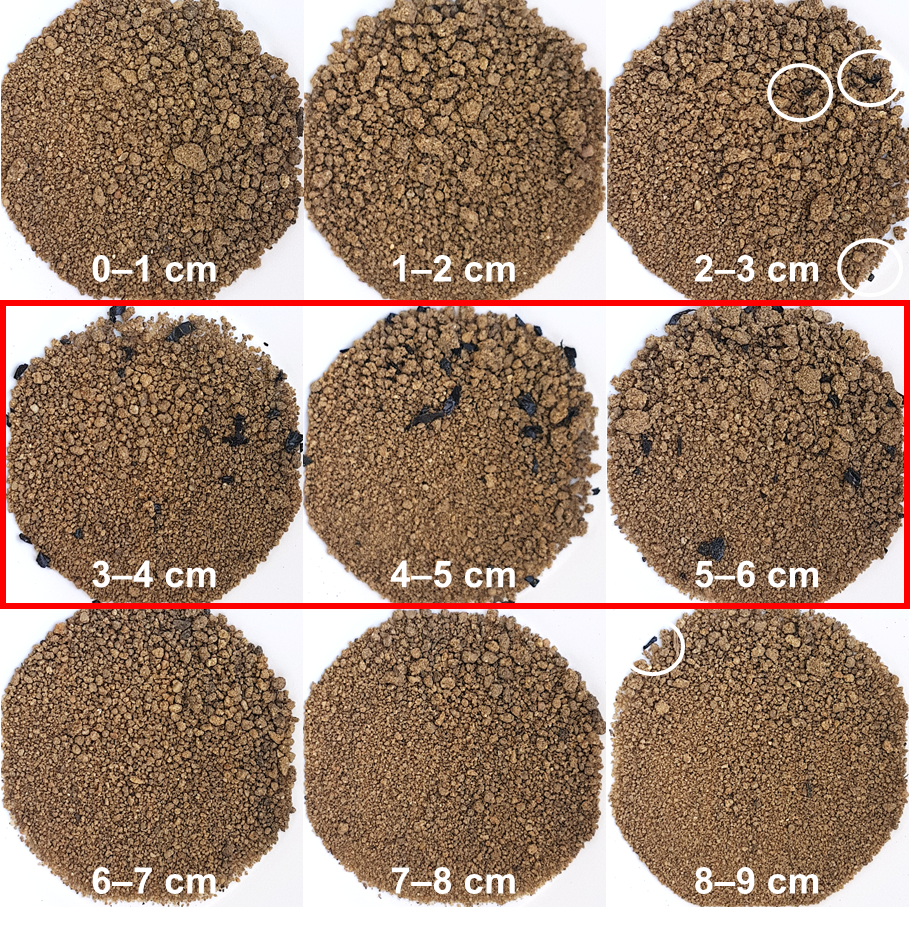
Figure S3**. The close-up photographs of soil samples in each depth (0–9 cm) of LDPE film treatment (60 days, low-level irrigation). The red border indicates microplastic-containing soil layer (3–6 cm), and LDPE films observed in the top (0–3 cm) and bottom (6–9 cm) layers were marked in the white circles.

**
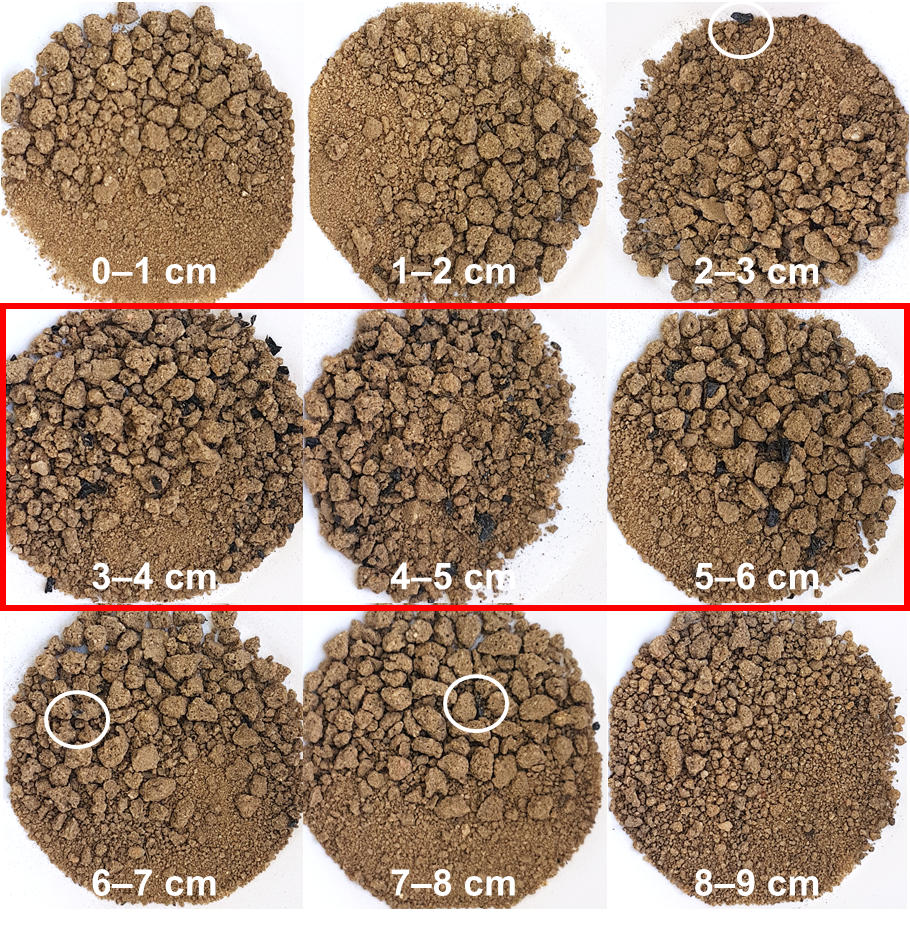
Figure S4**. The close-up photographs of soil samples in each depth (0–9 cm) of LDPE film treatment (60 days, high-level irrigation). The red border indicates microplastic-containing soil layer (3–6 cm), and LDPE films observed in the top (0–3 cm) and bottom (6–9 cm) layers were marked in the white circles.

**
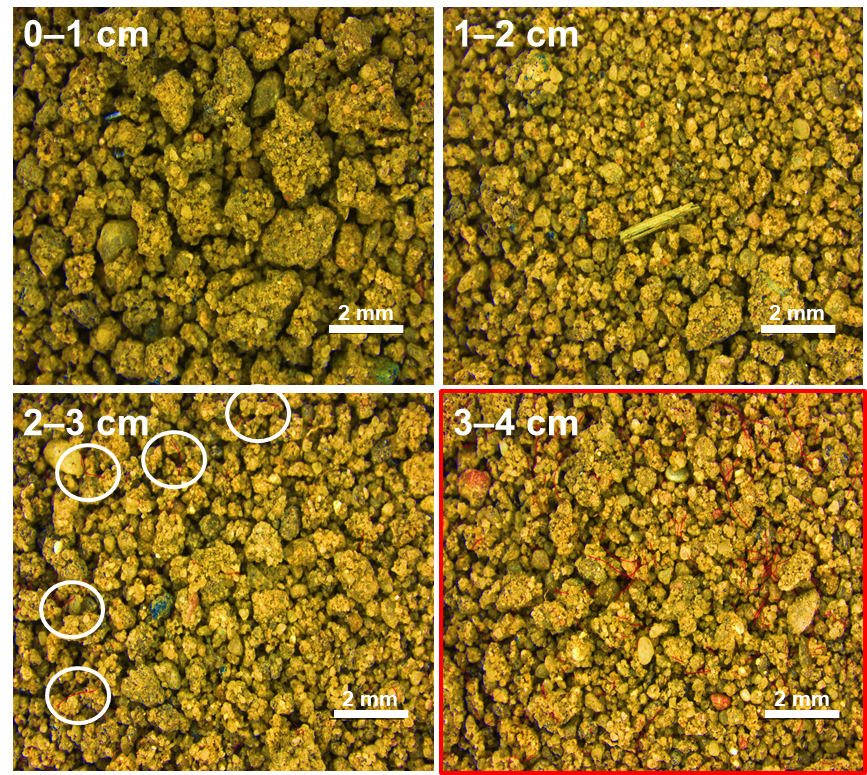
Figure S5**. The close-up photographs of soil samples in each depth (0–9 cm) of PAN fiber treatment (60 days, low-level irrigation). The red borders indicate microplastic-soil layer (3–6 cm), and PAN fibers observed in the top (0–3 cm) and bottom (6–9 cm) layers were marked in the white circles.

**
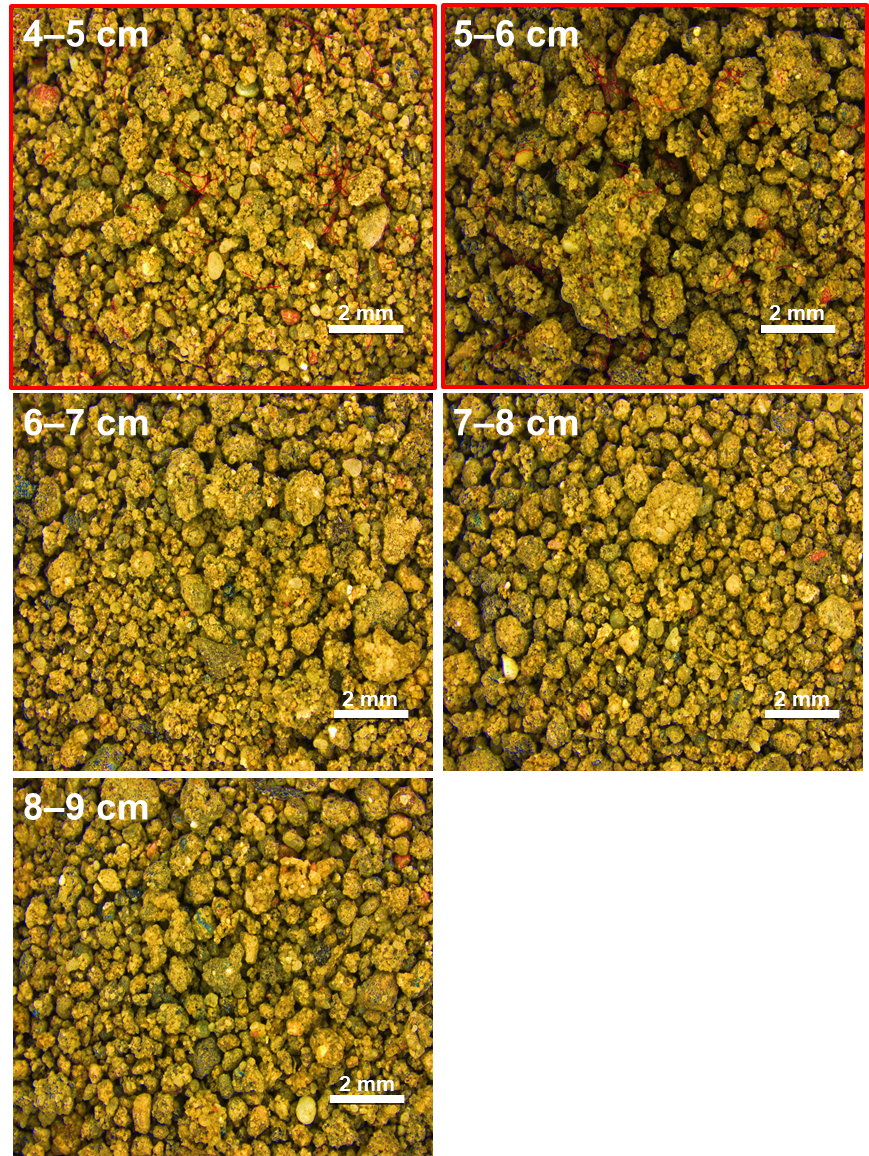
Figure S5**. Continued

**
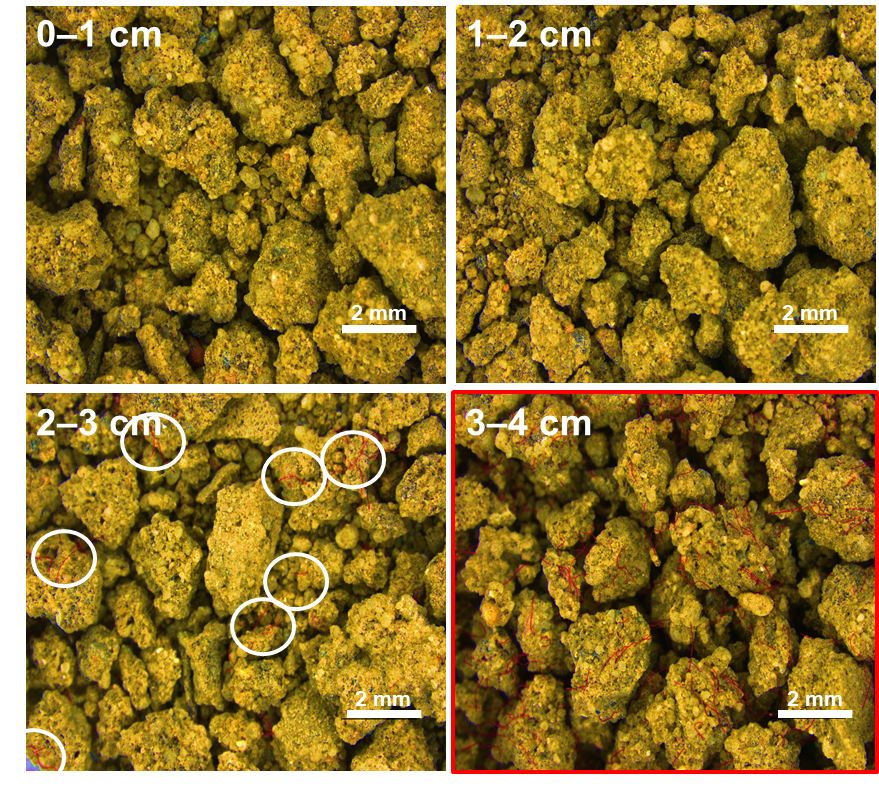
Figure S6**. The close-up photographs of soil samples in each depth (0–9 cm) of PAN fiber treatment (60 days, high-level irrigation). The red borders indicate microplastic-soil layer (3–6 cm), and PAN fibers observed in the top (0–3 cm) and bottom (6–9 cm) layers were marked in the white circles.

**
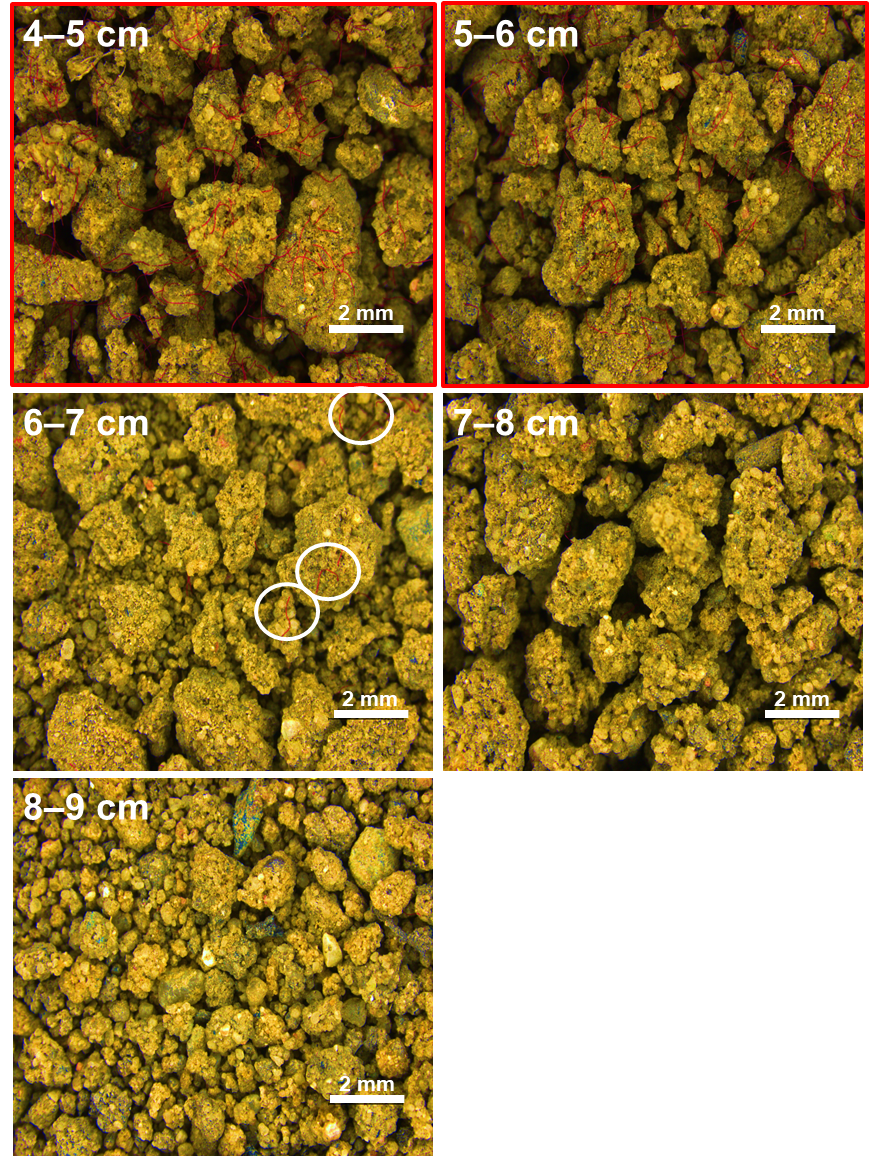
Figure S6**. Continued

**
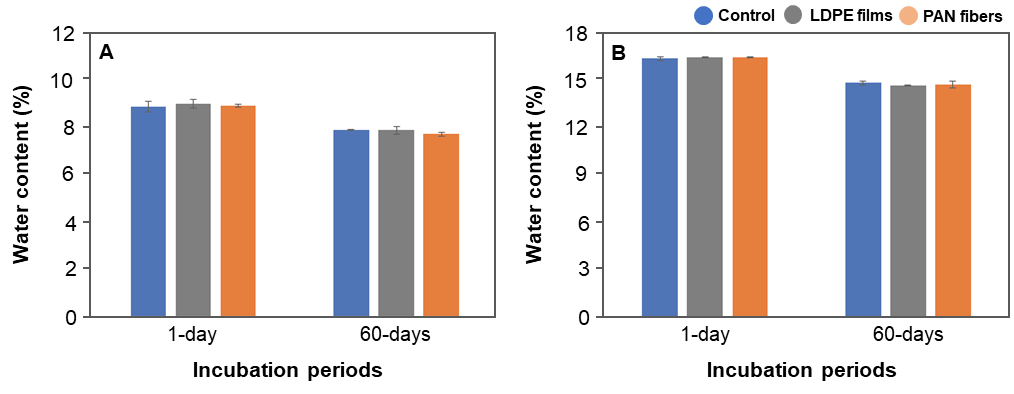
Figure S7**. Total water contents in each soil column (control, LDPE films, and PAN fibers) after (A) low- and (B) high-level irrigations.

**Table S1.** Results for soil respirations and enzyme activities (acid phosphatase and β-D-glucosidase). Asterisk represents significance at the level of 5% (p = 0.05) between control and microplastic-containing soil layer treatments.

| Soil depth | Top (0–3 cm) | | | Middle (3–6 cm) | | | Bottom (6–9 cm) | | |
| --- | --- | --- | --- | --- | --- | --- | --- | --- | --- |
| Treatment | Control | LDPE | PAN | Control | LDPE | PAN | Control | LDPE | PAN |
| Low-level irrigation | | | | | | | | | |
| Soil respiration  (ppm h-1) | 5.22  ±1.09 | 5.25  ±0.43 | 5.10  ±0.18 | 4.45  ±0.69 | 4.07  ±0.36 | 3.78  ±0.18 | 3.27  ±0.45 | 2.54  ±0.12* | 2.75  ±0.36* |
| Acid phosphatase  (µmol mg-1 h-1) | 5.41  ±2.72 | 5.14  ±0.79 | 4.35  ±1.29 | 3.44  ±0.19 | 5.64  ±1.02 | 4.13  ±0.73 | 5.40  ±3.05 | 4.79  ±0.55 | 8.90  ±5.02 |
| β-D-glucosidase  (µmol mg-1 h-1) | NC | NC | NC | NC | NC | NC | 2.96  ±1.44 | 1.92  ±0.48 | 3.68  ±2.30 |
| High-level irrigation | | | | | | | | | |
| Soil respiration  (ppm h-1) | 3.77  ±0.58 | 4.33  ±0.37 | 2.63  ±0.78 | 4.60  ±1.43 | 5.12  ±1.81 | 3.73  ±0.30 | 6.26  ±0.80 | 7.64  ±0.79* | 7.86  ±0.38* |
| Acid phosphatase  (µmol mg-1 h-1) | 5.60  ±1.86 | 6.26  ±1.74 | 24.02  ±19.07 | 4.87  ±0.68 | 5.67  ±0.27 | 11.37  ±11.67 | 4.09  ±0.35 | 5.12  ±0.98 | 8.32  ±6.06 |
| β-D-glucosidase  (µmol mg-1 h-1) | NC | NC | NC | NC | NC | NC | 2.10  ±0.24 | 2.52  ±0.36 | 3.08  ±1.67 |
